# Supplementary material
Source: PubMed Central journal article supplement (PMC2896811)
Supplement: NIHMS206022-supplement-Supp.pdf [file NIHMS206022-supplement-Supp.pdf]

# Supporting Information

The Melanocortin Tetrapeptide Ac-His-DPhe-Arg-Trp-  
NH<sub>2</sub> Modified at the Para Position of the Benzyl Side  
Chain (DPhe): Importance for Mouse Melanocortin-3  
Receptor Agonist Versus Antagonist Activity

Bettina Proneth, Irina D. Pogozeva, Federico P. Portillo, Henry I. Mosberg

and Carrie Haskell-Luevano

Table Supplemental Data. Analytical Data for Peptides Synthesized in this Study.

| Peptide | Structure                                              | HPLC $k'$ <sup>1</sup><br>(system 1) | HPLC $k'$ <sup>2</sup><br>(system 2) | M+1<br>(calculated) | Mass spectral<br>analysis (M+1) | Purity (%) <sup>3</sup> |
|---------|--------------------------------------------------------|--------------------------------------|--------------------------------------|---------------------|---------------------------------|-------------------------|
| 5       | Ac-His-DPhe <sup>7</sup> -Arg-Trp-NH <sub>2</sub>      | 4.1                                  | 6.7                                  | 686.8               | 686.5                           | >97                     |
| 6       | Ac-His-DTyr-Arg-Trp-NH <sub>2</sub> Tyr                | 3.6                                  | 5.4                                  | 702.8               | 702.3                           | >97                     |
| 7       | Ac-His-DPhe(pNH <sub>2</sub> )-Arg-Trp-NH <sub>2</sub> | 2.1                                  | 5.0                                  | 701.8               | 701.5                           | >97                     |
| 8       | Ac-His-DPhe(pCH <sub>3</sub> )-Arg-Trp-NH <sub>2</sub> | 4.6                                  | 8.0                                  | 700.8               | 700.5                           | >97                     |
| 9       | Ac-His-DPhe(pt-Bu)-Arg-Trp-NH <sub>2</sub>             | 6.1                                  | 10.4                                 | 742.9               | 742.5                           | >96                     |
| 10      | Ac-His-DPhe(pBz)-Arg-Trp-NH <sub>2</sub>               | 4.5                                  | 9.5                                  | 776.9               | 777.1                           | >97                     |
| 11      | Ac-His-DPhe(pCN)-Arg-Trp-NH <sub>2</sub>               | 4.2                                  | 6.9                                  | 711.8               | 711.3                           | >97                     |
| 12      | Ac-His-DPhe(pNO <sub>2</sub> )-Arg-Trp-NH <sub>2</sub> | 4.8                                  | 7.3                                  | 731.8               | 731.5                           | >98                     |
| 13      | Ac-His-DPhe(pF)-Arg-Trp-NH <sub>2</sub>                | 5.5                                  | 7.3                                  | 704.8               | 704.6                           | >98                     |
| 14      | Ac-His-DPhe(pCl)-Arg-Trp-NH <sub>2</sub>               | 4.4                                  | 8.2                                  | 721.2               | 720.4                           | >97                     |
| 15      | Ac-His-DPhe(pBr)-Arg-Trp-NH <sub>2</sub>               | 4.9                                  | 8.5                                  | 765.7               | 766.4                           | >99                     |
| 16      | Ac-His-DPhe(pI)-Arg-Trp-NH <sub>2</sub>                | 5.1                                  | 8.9                                  | 812.7               | 812.5                           | >98                     |
| 17      | Ac-His-DPhe(pCF <sub>3</sub> )-Arg-Trp-NH <sub>2</sub> | 5.0                                  | 9.1                                  | 754.3               | 754.7                           | >98                     |
| 19      | Ac-His-DPhe(3,4-diCl)-Arg-Trp-NH <sub>2</sub>          | 5.2                                  | 9.2                                  | 755.6               | 754.3                           | >99                     |
| 20      | Ac-His- DPhe(m-Cl)-Arg-Trp-NH <sub>2</sub>             | 4.5                                  | 8.3                                  | 721.2               | 720.3                           | >99                     |

The HPLC  $k'$  value equals [(peptide retention time – solvent retention time)/ solvent retention time]. Two different solvent systems were used. <sup>1</sup>Solvent system 1 equals (10% acetonitrile in 0.1% trifluoroacetic acid/H<sub>2</sub>O and a gradient to 90% acetonitrile over 35 min). <sup>2</sup>Solvent system 2 equals (10% methanol in 0.1% trifluoroacetic acid/ H<sub>2</sub>O and a gradient to 90% methanol over 35 min). The analytical Vydac C18 column (Vydac 218TP104) in combination with a flow rate of 1.5 ml/min was used for analytical characterization. <sup>3</sup>The peptide purity was determined by HPLC at a wavelength of 214 nm.
